# Supplementary material for: Flow Mediated Dilatation and Progression of Abdominal Aortic Aneurysms
Source: PubMed Central journal article supplement — Eur J Vasc Endovasc Surg. Author manuscript; Available in PMC 2017 Jul 4. (PMC5496669; doi:10.1016/j.ejvs.2017.03.001), 2017-04-14
Supplement: NIHMS73142-supplement-Supplemental_Table_1.pdf [file NIHMS73142-supplement-Supplemental_Table_1.pdf]

**Supplemental Table 1: Correlation between participant characteristics and FMD at baseline assessment**

|                                               | Correlation with FMD |       |
|-----------------------------------------------|----------------------|-------|
|                                               | Spearman r           | P     |
| <b>AAA AP diameter (mm)</b>                   | -.28                 | .0003 |
| <b>Age (years)</b>                            | .06                  | .49   |
| <b>Gender</b>                                 | -.03                 | .72   |
| <b>Height (m)</b>                             | -.06                 | .45   |
| <b>Weight (kg)</b>                            | .01                  | .94   |
| <b>BMI</b>                                    | .02                  | .76   |
| <b>Systolic BP (mmHg)</b>                     | -.001                | .99   |
| <b>Diastolic BP (mmHg)</b>                    | -.01                 | .23   |
| <b>Total Cholesterol (mmol/L)</b>             | -.02                 | .85   |
| <b>HDL (mmol/L)</b>                           | -.01                 | .88   |
| <b>Calculated LDL (mmol/L)</b>                | -.1                  | .27   |
| <b>Triglycerides (mmol/L)</b>                 | .08                  | .33   |
| <b>Creatinine (umol/L)</b>                    | -.05                 | .58   |
| <b>CRP (mg/L)</b>                             | -.06                 | .49   |
| <b>History of smoking</b>                     |                      |       |
| Never Smoked                                  | .01                  | .94   |
| Ex-smoker                                     | .05                  | .50   |
| Current smoker                                | -.07                 | .37   |
| <b>History of diabetes</b>                    | -.004                | .96   |
| <b>HbA1c (mmol/mol)</b>                       | -.06                 | .52   |
| <b>History of coronary heart disease</b>      | -.02                 | .85   |
| <b>History of peripheral vascular disease</b> | .04                  | .80   |
| <b>History of cerebral vascular disease</b>   | .03                  | .72   |
| <b>History of chronic respiratory disease</b> | .09                  | .26   |
| <b>Family history of AAA</b>                  | -.1                  | .24   |
| <b>Regular medications</b>                    |                      |       |
| Aspirin                                       | -.07                 | .42   |
| Statins                                       | .09                  | .28   |
| Beta-Blockers                                 | -.05                 | .51   |
| ACEI/A <sub>2</sub> RA                        | .07                  | .40   |
| Anti-platelets                                | -.01                 | .93   |
| Oral anticoagulant                            | .01                  | .89   |
